# Supplementary material for: The Association between Food Security Status and the Home Food Environment among a Sample of Rural South Carolina Residents
Source: MDPI journal article supplement (doi:10.3390/nu15183918), 2023-09-09
Supplement: s1 [file s1]

## Supplementary Materials

### Supplementary Materials S1

**Table S1.** Fully Unadjusted Models with Home Food Environment as the Outcome Variable (Food Secure Respondents).

| VARIABLES                                   | ESTIMATE (CI)         | P-VALUE   |
|---------------------------------------------|-----------------------|-----------|
| <b>FOOD SECURITY STATUS</b>                 |                       |           |
| High food secure                            | -                     | -         |
| Marginal food secure                        | -0.92 (-1.83 - 0)     | 0.051     |
| <b>AGE</b>                                  | 0.01 (-0.02 - 0.03)   | 0.434     |
| <b>GENDER</b>                               |                       |           |
| Female                                      | -                     | -         |
| Male                                        | -0.33 (-1.38 - 0.73)  | 0.544     |
| <b>ETHNICITY</b>                            |                       |           |
| Not Hispanic                                | -                     | -         |
| Hispanic                                    | -0.93 (-4.2 - 2.34)   | 0.575     |
| <b>RACE</b>                                 |                       |           |
| White                                       | -                     | -         |
| Black                                       | -0.82 (-1.74 - 0.09)  | 0.079     |
| <b>MARITAL STATUS</b>                       |                       |           |
| Married                                     | -                     | -         |
| Unmarried                                   | 0.59 (-0.25 - 1.44)   | 0.166     |
| <b>EMPLOYMENT STATUS</b>                    |                       |           |
| Other                                       | -                     | -         |
| Employed/self-employed                      | -0.70 (-2.41 - 1.00)  | 0.415     |
| Unable to work                              | -1.34 (-3.37 - 0.68)  | 0.192     |
| Retired                                     | -0.94 (-2.82 - 0.93)  | 0.321     |
| Out of work                                 | 0.27 (-2.39 - 2.94)   | 0.839     |
| <b>INCOME</b>                               |                       |           |
| 75k+                                        | -                     | -         |
| Less than 10k                               | -1.77 (-3.26 - -0.29) | 0.019*    |
| 10-19,999k                                  | -2.20 (-3.55 - -0.86) | 0.001**   |
| 20-34,999k                                  | -2.47 (-3.78 - -1.16) | 0.0002*** |
| 35-49,999k                                  | -1.67 (-3.23 - -0.11) | 0.035*    |
| 50-74,999k                                  | -1.24 (-2.55 - 0.06)  | 0.063     |
| <b>BMI</b>                                  | 0.006 (-0.05 - 0.06)  | 0.844     |
| <b>EDUCATION STATUS</b>                     |                       |           |
| No HS degree                                | -                     | -         |
| HS/vocational/associate/professional degree | -0.37 (-1.69 - 0.94)  | 0.573     |
| Bachelor's degree                           | 1.03 (-0.43 - 2.51)   | 0.166     |
| Master's degree or higher                   | 1.08 (-0.53 - 2.71)   | 0.187     |
| <b>NUMBER OF CHILDREN IN THE HOUSEHOLD</b>  |                       |           |
| No children                                 | -                     | -         |
| One child                                   | -0.39 (-2.49 - 1.30)  | 0.626     |
| Two children                                | 0.52 (-1.08 - 2.12)   | 0.522     |
| Three or more children                      | -0.59 (-2.49 - 1.30)  | 0.535     |
| <b>FOOD PANTRY USAGE</b>                    |                       |           |
| Food pantry usage                           | -                     | -         |

|                                                  |                      |       |
|--------------------------------------------------|----------------------|-------|
| <b>No food pantry usage</b>                      | -0.67 (-1.56 – 0.21) | 0.135 |
| <b>FREE MEAL USAGE</b>                           |                      |       |
| Free meal usage                                  | -                    | -     |
| No free meal usage                               | -0.80 (-2.27 – 0.66) | 0.281 |
| <b>SCHOOL MEAL USAGE</b>                         |                      |       |
| School meal usage                                | -                    | -     |
| No school meal usage                             | -0.24 (-1.42 – 0.94) | 0.690 |
| <b>USED HUNTING/FISHING FOR FOOD</b>             |                      |       |
| Used hunting/fishing for food                    | -                    | -     |
| Did not use hunting/fishing for food             | 0.34 (-0.55 – 1.24)  | 0.449 |
| <b>USED FRIENDS/NEIGHBORS/COWORKERS FOR FOOD</b> |                      |       |
| Used friends/neighbors/coworkers for food        | -                    | -     |
| Did not use friends/neighbors/coworkers for food | -0.50 (-1.55 – 0.54) | 0.344 |
| <b>USED RELATIVES FOR FOOD</b>                   |                      |       |
| Used relatives outside the home                  | -                    | -     |
| Did not use relatives outside the home for food  | 0.04 (-0.88 – 0.96)  | 0.928 |
| <b>NUMBER OF SNAP VENDORS</b>                    | -0.01 (-0.14 – 0.10) | 0.729 |
| <b>HEALTHY SNAP VENDORS</b>                      | -0.10 (-0.75 – 0.55) | 0.700 |
| <b>UNHEALTHY SNAP VENDORS</b>                    | -0.01 (-0.16 – 0.13) | 0.752 |
| <b>STORE ACCESS</b>                              | 0.006 (-0.18 – 0.19) | 0.947 |
| <b>FOOD STAMP USAGE</b>                          |                      |       |
| No household food stamps 12 months               | -                    | -     |
| Household food stamps 12 months                  | -0.91 (-1.89 – 0.06) | 0.066 |

Note: CI = confidence interval; \*\*\*  $p < 0.005$ , \*\*  $p < 0.01$ , \*  $p < 0.05$ .

## Supplementaey Materials S2

**Table S2.** Fully Unadjusted Models with Home Food Environment as the Outcome Variable (Food Insecure Respondents).

| VARIABLES                                   | ESTIMATE (CI)         | P-VALUE  |
|---------------------------------------------|-----------------------|----------|
| <b>FOOD SECURITY STATUS</b>                 |                       |          |
| Low food secure                             | -                     | -        |
| Very low food secure                        | 0.7 (-0.31 - 1.72)    | 0.17     |
| AGE                                         | 0.02 (-0.01 - 0.06)   | 0.176    |
| <b>GENDER</b>                               |                       |          |
| Female                                      | -                     | -        |
| Male                                        | -0.38 (-1.63 - 0.87)  | 0.549    |
| <b>ETHNICITY</b>                            |                       |          |
| Not Hispanic                                | -                     | -        |
| Hispanic                                    | 1.03 (-3.48 - 5.54)   | 0.651    |
| <b>RACE</b>                                 |                       |          |
| White                                       | -                     | -        |
| Black                                       | 1.46 (0.21 - 2.72)    | 0.021    |
| <b>MARITAL STATUS</b>                       |                       |          |
| Not married                                 | -                     | -        |
| Married                                     | 0.64 (-0.41 - 1.68)   | 0.230    |
| <b>EMPLOYMENT STATUS</b>                    |                       |          |
| Employed/self-employed                      | -                     | -        |
| Other                                       | 0.77 (-1.11 - 2.66)   | 0.419    |
| Unable to work                              | -0.44 (-1.99 - -1.12) | 0.582    |
| Retired                                     | -0.19 (-1.60 - 1.21)  | 0.784    |
| Out of work                                 | 0.50 (-1.73 - 2.74)   | 0.655    |
| <b>INCOME</b>                               |                       |          |
| Less than 10k                               | -                     | -        |
| 10-19,999k                                  | 1.52 (0.06 - 2.98)    | 0.037*   |
| 20-34,999k                                  | 0.59 (-0.8 - 1.98)    | 0.394    |
| 35-49,999k                                  | 2.44 (0.38 - 4.49)    | 0.018*   |
| 50-74,999k                                  | 2.04 (-0.28 - 4.36)   | 0.084*   |
| 75k+                                        | 0.46 (-4.16 - 5.07)   | 0.841    |
| BMI                                         | 0.04 (-0.03 - 0.11)   | 0.258    |
| <b>EDUCATION STATUS</b>                     |                       |          |
| No HS degree                                | -                     | -        |
| HS/vocational/associate/professional degree | 0.7 (-0.68 - 2.09)    | 0.318    |
| Bachelor's degree                           | 2.21 (0.5 - 3.92)     | 0.017*   |
| Master's degree or higher                   | 1.63 (-0.89 - 4.15)   | 0.202    |
| <b>NUMBER OF CHILDREN IN THE HOUSEHOLD</b>  |                       |          |
| No children                                 | -                     | -        |
| One child                                   | -0.08 (-2.02 - 1.85)  | 0.932    |
| Two children                                | -0.4 (-2.42 - 1.61)   | 0.691    |
| Three or more children                      | 0.52 (-1.42 - 2.45)   | 0.596    |
| <b>FOOD PANTRY USAGE</b>                    |                       |          |
| Food pantry usage                           | -                     | -        |
| No food pantry usage                        | -1.59 (-2.61 - -0.56) | 0.002*** |
| <b>FREE MEAL USAGE</b>                      |                       |          |
| Free meal usage                             |                       |          |

|                                                  |                      |       |
|--------------------------------------------------|----------------------|-------|
| No free meal usage                               | -0.66 (-1.83 - 0.51) | 0.265 |
| <b>SCHOOL MEAL USAGE</b>                         |                      |       |
| School meal usage                                |                      |       |
| No school meal usage                             | -0.24 (-1.45 - 0.97) | 0.694 |
| <b>USED HUNTING/FISHING FOR FOOD</b>             |                      |       |
| Used hunting/fishing for food                    | -                    | -     |
| Did not use hunting/fishing for food             | -0.02 (-1.13 - 1.1)  | 0.977 |
| <b>USED FRIENDS/NEIGHBORS/COWORKERS FOR FOOD</b> |                      |       |
| Used friends/neighbors/coworkers for food        | -                    | -     |
| Did not use friends/neighbors/coworkers for food | -0.71 (-1.75 - 0.32) | 0.175 |
| <b>USED RELATIVES FOR FOOD</b>                   |                      |       |
| Used relatives outside the home                  | -                    | -     |
| Did not use relatives outside the home for food  | -0.29 (-1.32 - 0.75) | 0.585 |
| <b>NUMBER OF SNAP VENDORS</b>                    | -0.05 (-0.12 - 0.02) | 0.178 |
| <b>HEALTHY SNAP VENDORS</b>                      | -0.3 (-0.68 - 0.08)  | 0.117 |
| <b>UNHEALTHY SNAP VENDORS</b>                    | -0.05 (-0.15 - 0.05) | 0.253 |
| <b>STORE ACCESS</b>                              | 0.07 (-0.21 - 0.36)  | 0.608 |
| <b>FOOD STAMP USAGE</b>                          |                      |       |
| No household food stamps 12 months               | -                    | -     |
| Household food stamps 12 months                  | -0.86 (-1.9 - 0.18)  | 0.102 |

Note: CI = confidence interval; \*\*\*  $p < 0.005$ , \*  $p < 0.05$ .

## Supplementary Materials S3

**Table S3.** Fully Adjusted Model with Home Food Environment as the Outcome Variable (Food Secure Respondents).

| VARIABLES                                   | ESTIMATE (CI)        | P-VALUE |
|---------------------------------------------|----------------------|---------|
| <b>FOOD SECURITY STATUS</b>                 |                      |         |
| High food secure                            | -                    | -       |
| Marginal food secure                        | 0.20 (-2.0 - 2.49)   | 0.858   |
| AGE                                         | 0.01 (-0.08 - 0.1)   | 0.810   |
| <b>GENDER</b>                               |                      |         |
| Female                                      | -                    | -       |
| Male                                        | 0.01 (-3.04 - 3.05)  | 0.996   |
| <b>ETHNICITY</b>                            |                      |         |
| Not Hispanic                                | -                    | -       |
| Hispanic                                    | -1.03 (-9.31 - 7.26) | 0.803   |
| <b>RACE</b>                                 |                      |         |
| White                                       | -                    | -       |
| Black                                       | 0.55 (-2.42 - 3.52)  | 0.709   |
| <b>MARITAL STATUS</b>                       |                      |         |
| Not married                                 | -                    | -       |
| Married                                     | 0.44 (-2.21 - 3.1)   | 0.737   |
| <b>EMPLOYMENT STATUS</b>                    |                      |         |
| Employed/self-employed                      | -                    | -       |
| Other                                       | 3.36 (-1.5 - 8.22)   | 0.169   |
| Unable to work                              | 1.91 (-2.54 - 6.36)  | 0.391   |
| Retired                                     | 2.44 (-1.27 - 6.15)  | 0.192   |
| Out of work                                 | 0.69 (-8.26 - 9.63)  | 0.877   |
| <b>INCOME</b>                               |                      |         |
| Less than 10k                               | -                    | -       |
| 10-19,999k                                  | 1.29 (-3.83 - 6.41)  | 0.613   |
| 20-34,999k                                  | -0.04 (-5.03 - 4.95) | 0.987   |
| 35-49,999k                                  | 0.86 (-5.52 - 7.24)  | 0.787   |
| 50-74,999k                                  | 1.06 (-5.15 - 7.27)  | 0.732   |
| 75k+                                        | 3.25 (-3.01 - 9.5)   | 0.300   |
| BMI                                         | 0 (-0.12 - 0.12)     | 0.995   |
| <b>STORE ACCESS</b>                         | -0.12 (-0.61 - 0.37) | 0.619   |
| <b>EDUCATION STATUS</b>                     |                      |         |
| No HS degree                                | -                    | -       |
| HS/vocational/associate/professional degree | 0.07 (-3.38 - 3.52)  | 0.968   |
| Bachelor's degree                           | 1.23 (-2.91 - 5.36)  | 0.552   |
| Master's degree or higher                   | 2.52 (-2.01 - 7.06)  | 0.267   |
| <b>NUMBER OF CHILDREN IN THE HOUSEHOLD</b>  |                      |         |
| Zero children                               | -                    | -       |
| One child                                   | -0.29 (-3.08 - 2.49) | 0.831   |
| Two children                                | 0.07 (-3.06 - 3.19)  | 0.965   |
| Three or more children                      | 0.21 (-3.66 - 4.08)  | 0.912   |
| <b>FOOD STAMP USAGE</b>                     |                      |         |
| No household food stamps 12 months          | -                    | -       |
| Household food stamps 12 months             | -0.05 (-2.59 - 2.49) | 0.971   |
| <b>FOOD PANTRY USAGE</b>                    |                      |         |

|                                                         |                      |       |
|---------------------------------------------------------|----------------------|-------|
| <b>Food pantry usage</b>                                | -                    | -     |
| <b>No food pantry usage</b>                             | 1.42 (-1.1 - 3.95)   | 0.262 |
| <b>FREE MEAL USAGE</b>                                  |                      |       |
| <b>Free meal usage</b>                                  | -                    | -     |
| <b>No free meal usage</b>                               | 0.1 (-3.66 - 3.87)   | 0.955 |
| <b>SCHOOL MEAL USAGE</b>                                |                      |       |
| <b>School meal usage</b>                                | -                    | -     |
| <b>No school meal usage</b>                             | -0.95 (-3.7 - 1.81)  | 0.492 |
| <b>USED HUNTING/FISHING FOR FOOD</b>                    |                      |       |
| <b>Used hunting/fishing for food</b>                    | -                    | -     |
| <b>Did not use hunting/fishing for food</b>             | -0.57 (-2.75 - 1.61) | 0.599 |
| <b>USED FRIENDS/NEIGHBORS/COWORKERS FOR FOOD</b>        |                      |       |
| <b>Used friends/neighbors/coworkers for food</b>        | -                    | -     |
| <b>Did not use friends/neighbors/coworkers for food</b> | 0.95 (-1.97 - 3.88)  | 0.514 |
| <b>USED RELATIVES OUTSIDE THE HOME FOR FOOD</b>         |                      |       |
| <b>Used relatives outside the home for food</b>         | -                    | -     |
| <b>Did not use relatives outside the home for food</b>  | -0.4 (-2.94 - 2.13)  | 0.749 |
| <b>NUMBER OF SNAP VENDORS</b>                           | -0.03 (-0.29 - 0.24) | 0.831 |
| <b>HEALTHY SNAP VENDORS</b>                             | 0.02 (-1.21 - 1.25)  | 0.975 |

Note: CI = confidence interval.

## Supplementary Materials S4

**Table S4.** Fully Adjusted Model with Home Food Environment as the Outcome Variable (Food Insecure Respondents).

| VARIABLES                                   | ESTIMATE (CI)        | P-VALUE |
|---------------------------------------------|----------------------|---------|
| <b>FOOD SECURITY STATUS</b>                 |                      |         |
| Low food secure                             | -                    | -       |
| Very low food secure                        | 0.51 (-1.78 - 2.79)  | 0.656   |
| <b>AGE</b>                                  | 0.07 (-0.04 - 0.17)  | 0.194   |
| <b>GENDER</b>                               |                      |         |
| Female                                      | -                    | -       |
| Male                                        | -0.05 (-2.64 - 2.54) | 0.970   |
| <b>ETHNICITY</b>                            |                      |         |
| Not Hispanic                                | -                    | -       |
| Hispanic                                    | 1.89 (-1.06 - 4.84)  | 0.201   |
| <b>RACE</b>                                 |                      |         |
| White                                       | -                    | -       |
| Black                                       | -0.94 (-3.39 - 1.51) | 0.443   |
| <b>MARITAL STATUS</b>                       |                      |         |
| Not married                                 | -                    | -       |
| Married                                     | -0.79 (-4.73 - 3.16) | 0.69    |
| <b>EMPLOYMENT STATUS</b>                    |                      |         |
| Employed/self-employed                      | -                    | -       |
| Other                                       | -0.06 (-3.89 - 3.77) | 0.974   |
| Unable to work                              | -0.71 (-4.09 - 2.67) | 0.672   |
| Retired                                     | -2.29 (-6.18 - 1.59) | 0.239   |
| Out of work                                 | -0.78 (-4.72 - 3.15) | 0.688   |
| <b>INCOME</b>                               |                      |         |
| Less than 10k                               | -                    | -       |
| 10-19,999k                                  | 0.91 (-2.07 - 3.90)  | 0.539   |
| 20-34,999k                                  | -1.29 (-4.63 - 2.04) | 0.438   |
| 35-49,999k                                  | 1.24 (-2.88 - 5.37)  | 0.545   |
| 50-74,999k                                  | 1.27 (-3.79 - 6.32)  | 0.614   |
| <b>BMI</b>                                  | -0.02 (-0.16 - 0.12) | 0.774   |
| <b>STORE ACCESS</b>                         | -0.47 (-1.1 - 0.15)  | 0.131   |
| <b>EDUCATION STATUS</b>                     |                      |         |
| No HS degree                                | -                    | -       |
| HS/vocational/associate/professional degree | 3.31 (0.38 - 6.24)   | 0.027*  |
| Bachelor's degree                           | 5.87 (1.65 - 10.08)  | 0.007** |
| Master's degree or higher                   | 4.46 (-0.22 - 9.13)  | 0.061   |
| <b>NUMBER OF CHILDREN IN THE HOUSEHOLD</b>  |                      |         |
| Zero children                               | -                    | -       |
| One child                                   | 1.64 (-1.69 - 4.97)  | 0.325   |
| Two children                                | 1.24 (-2.04 - 4.53)  | 0.449   |
| Three or more children                      | 2.06 (-1.62 - 5.73)  | 0.264   |
| <b>FOOD STAMP USAGE</b>                     |                      |         |
| No household food stamps 12 months          | -                    | -       |
| Household food stamps 12 months             | 0.14 (-1.98 - 2.26)  | 0.894   |
| <b>FOOD PANTRY USAGE</b>                    |                      |         |
| Food pantry usage                           | -                    | -       |

|                                                  |                      |       |
|--------------------------------------------------|----------------------|-------|
| No food pantry usage                             | -2.18 (-4.85 - 0.48) | 0.105 |
| <b>FREE MEAL USAGE</b>                           |                      |       |
| Free meal usage                                  |                      |       |
| No free meal usage                               | 0.62 (-2.41 - 3.64)  | 0.682 |
| <b>SCHOOL MEAL USAGE</b>                         |                      |       |
| School meal usage                                |                      |       |
| No school meal usage                             | 0.99 (-1.88 - 3.86)  | 0.487 |
| <b>USED HUNTING/FISHING FOR FOOD</b>             |                      |       |
| Used hunting/fishing for food                    |                      |       |
| Did not use hunting/fishing for food             | -0.66 (-3.06 - 1.74) | 0.582 |
| <b>USED FRIENDS/NEIGHBORS/COWORKERS FOR FOOD</b> |                      |       |
| Used friends/neighbors/coworkers for food        |                      |       |
| Did not use friends/neighbors/coworkers for food | -1.89 (-5.34 - 1.56) | 0.273 |
| <b>USED RELATIVES OUTSIDE THE HOME FOR FOOD</b>  |                      |       |
| Used relatives outside the home for food         |                      |       |
| Did not use relatives outside the home for food  | 0.74 (-2.55 - 4.03)  | 0.651 |
| <b>NUMBER OF SNAP VENDORS</b>                    | 0.15 (-0.14 - 0.44)  | 0.293 |
| <b>HEALTHY SNAP VENDORS</b>                      | -0.99 (-2.29 - 0.31) | 0.130 |

Note: CI = confidence interval; \*\*  $p < 0.01$ , \*  $p < 0.05$ .



## Supplementary Materials S5

**Table S5.** Intraclass Correlation Coefficients (ICC's) (All Respondents).

| MEASURE                                          | ICC VALUE | 95% CI          |
|--------------------------------------------------|-----------|-----------------|
| <b>Food Security Status</b>                      | 0.062     | (0.003 – 0.149) |
| <b>Age</b>                                       | 0.106     | (0.014 – 0.219) |
| <b>Gender</b>                                    | 0.082     | (0.005 – 0.184) |
| <b>Ethnicity</b>                                 | 0.080     | (0.007 – 0.184) |
| <b>Race</b>                                      | 0.093     | (0.013 – 0.212) |
| <b>Marital Status</b>                            | 0.068     | (0.005 – 0.177) |
| <b>Employment Status</b>                         | 0.084     | (0.009 – 0.193) |
| <b>Income</b>                                    | 0.033     | (0.003 – 0.113) |
| <b>BMI</b>                                       | 0.056     | (0.004 – 0.147) |
| <b>Store Access</b>                              | 0.087     | (0.016 – 0.246) |
| <b>Education Status</b>                          | 0.068     | (0.008 – 0.171) |
| <b>Number Of Children In The Household</b>       | 0.075     | (0.005 – 0.213) |
| <b>Household Food Stamps 12 Months</b>           | 0.083     | (0.008 – 0.171) |
| <b>Food Pantry Usage</b>                         | 0.086     | (0.010 – 0.186) |
| <b>Free Meal Usage</b>                           | 0.094     | (0.013 – 0.209) |
| <b>School Meal Usage</b>                         | 0.078     | (0.009 – 0.191) |
| <b>Used Hunting/Fishing For Food</b>             | 0.084     | (0.007 – 0.208) |
| <b>Used Friends/Neighbors/Coworkers For Food</b> | 0.087     | (0.009 – 0.176) |
| <b>Used Relatives Outside The Home For Food</b>  | 0.078     | (0.013 – 0.192) |
| <b>Number Of SNAP Vendors</b>                    | 0.086     | (0.012 – 0.206) |
| <b>Healthy SNAP Vendors</b>                      | 0.085     | (0.007 – 0.223) |
| <b>Unhealthy SNAP Vendors</b>                    | 0.088     | (0.007 – 0.168) |

Note: ICC = intraclass correlation coefficient; CI = confidence interval.

Note: Table S5 shows the intraclass correlation coefficients (ICC's) for each of the unadjusted LMM models. The minimum ICC value found is 0.033 and the maximum ICC value found is 0.106. The median ICC value found is 0.0835. The measures found in Table S5 are the individual predictors that were included in each unadjusted model. For example, the corresponding ICC for the unadjusted model which identified the association between food security status and the home food environment (with zip code as the random intercept variable) is 0.062. This suggests that for this unadjusted model, about 6.2% of the variation in home food environment scores can be attributed to participant zip code.

*Supplementary Materials S6*

R-Code

```
library("haven")
library("cat")
library("car")
library("table1")
library("tidyverse")
library("tibble")
library("gapminder")
library("highcharter")
library("knitr")
library("kableExtra")
library("dplyr")
library("epiDisplay")
library("expss")
library("nlme")
library("tidyr")
library("dplyr")
library("ggplot2")
library("readxl")
library("emmeans")
library("sjstats")
library("lme4")
library("lmerTest")
library("MuMIn")
library("xtable")
library("broom")
library("broom.mixed")
library("readxl")
library("janitor")
library("irr")
library("performance")
library("boot")
library("psych")

#Import Data
HOP_SurveyData <- read_sav("~/HOP/Survey Data/HOP_SurveyData.sav")
View(HOP_SurveyData)
View(HOP_SurveyData_SNAP_Vendors)

#Merge Data
#SNAP Vendors
SNAP_Vendors <- read_excel("C:\\Users\\hossf\\OneDrive - Clemson University\\Documents\\HOP\\Michelle
Eichinger\\SNAP Vendors\\SNAP_Store_Locations_Comparison\\SNAP_Vendors_by_ZipCode.xlsx")
colnames(HOP_SurveyData)
colnames(SNAP_Vendors)
HOP_SurveyData_SNAP_Vendors <- merge(HOP_SurveyData, SNAP_Vendors, by="ZipCode", all.x=TRUE)
colnames(HOP_SurveyData_SNAP_Vendors)
```

```
HOP_Study_SNAP_Vendors <- filter(SNAP_Vendors, ZipCode %in% HOP_SurveyData_SNAP_Vendors$ZipCode)
View(SNAP_Vendors)
View(HOP_SurveyData_SNAP_Vendors)
View(HOP_Study_SNAP_Vendors)
```

#### #Descriptive Statistics and Frequencies

```
table1(~Home_Food_Environment+factor(sum_foodsecurity_binary)+Q53_1_A+factor(Male)+factor(Hispanic)+factor(RACE)+factor(Marriage)+factor(EmploymentStatus)+factor(Income)+bmi_continuous+sum_storeaccess+factor(EducationStatus1)+factor(ChildrenHousehold)+factor(FFS)+factor(Q6_1_1)+factor(Q6_2_2)+factor(Q6_3_3)+factor(Q6_4_4)+factor(Q6_5_5)+factor(Q6_6_6)+factor(ZipCode)+Number_of_SNAP_Vendors+Healthy_SNAP_Vendors+Unhealthy_SNAP_Vendors, data=HOP_SurveyData_SNAP_Vendors, caption=caption)
table1(~Number_of_SNAP_Vendors, data=SNAP_Vendors)
table1(~HOP_Study_SNAP_Vendors$Number_of_SNAP_Vendors)
table1(~HOP_Study_SNAP_Vendors$Healthy_SNAP_Vendors)
table1(~HOP_Study_SNAP_Vendors$Unhealthy_SNAP_Vendors)
```

#### #Frequencies for Relevant Variables

```
HOP_SurveyData_SNAP_Vendors$sum_foodsecurity_binary <- factor(HOP_SurveyData_SNAP_Vendors$sum_foodsecurity_binary, levels=c(1,0), labels=c("Food Secure", "Food Insecure"))
HOP_SurveyData_SNAP_Vendors$Male <- factor(HOP_SurveyData_SNAP_Vendors$Male, levels=c(1,0), labels=c("Male", "Female"))
HOP_SurveyData_SNAP_Vendors$Hispanic <- factor(HOP_SurveyData_SNAP_Vendors$Hispanic, levels=c(1,0), labels=c("Hispanic", "Not Hispanic"))
HOP_SurveyData_SNAP_Vendors$RACE <- factor(HOP_SurveyData_SNAP_Vendors$RACE, levels=c(2,1), labels=c("Black", "White"))
HOP_SurveyData_SNAP_Vendors$Marriage <- factor(HOP_SurveyData_SNAP_Vendors$Marriage, levels=c(1,0), labels=c("Married", "Unmarried"))
HOP_SurveyData_SNAP_Vendors$EmploymentStatus <- factor(HOP_SurveyData_SNAP_Vendors$EmploymentStatus, levels=c(10,4,3,2,1), labels=c("Other", "Unable to Work", "Retired", "Out of Work", "Employed/Self-Employed"))
HOP_SurveyData_SNAP_Vendors$Income <- factor(HOP_SurveyData_SNAP_Vendors$Income, levels=c(6,5,4,3,2,1), labels=c("75K+", "50-74,999K", "35-49,999K", "20-34,999K", "10-19,999K", "Less than 10K"))
HOP_SurveyData_SNAP_Vendors$EducationStatus1 <- factor(HOP_SurveyData_SNAP_Vendors$EducationStatus1, levels=c(4,3,2,1), labels=c("Master's Degree or Higher", "Bachelor's Degree", "HS Degree through Associate Degree", "No HS Degree"))
HOP_SurveyData_SNAP_Vendors$ChildrenHousehold <- factor(HOP_SurveyData_SNAP_Vendors$ChildrenHousehold, levels=c(3,2,1,0), labels=c("Three or More Children", "Two Children", "One Child", "No Children"))
HOP_SurveyData_SNAP_Vendors$FFS <- factor(HOP_SurveyData_SNAP_Vendors$FFS, levels=c(1,0), labels=c("Household Food Stamps 12 Months", "No Household Food Stamps 12 Months"))
HOP_SurveyData_SNAP_Vendors$Q6_1_1 <- factor(HOP_SurveyData_SNAP_Vendors$Q6_1_1, levels=c(1,0), labels=c("Food Pantry Usage", "No Food Pantry Usage"))
HOP_SurveyData_SNAP_Vendors$Q6_2_2 <- factor(HOP_SurveyData_SNAP_Vendors$Q6_2_2, levels=c(1,0), labels=c("Free Meal Usage", "No Free Meal Usage"))
HOP_SurveyData_SNAP_Vendors$Q6_3_3 <- factor(HOP_SurveyData_SNAP_Vendors$Q6_3_3, levels=c(1,0), labels=c("School Meal Usage", "No School Meal Usage"))
HOP_SurveyData_SNAP_Vendors$Q6_4_4 <- factor(HOP_SurveyData_SNAP_Vendors$Q6_4_4, levels=c(1,0), labels=c("Hunting/Fishing", "No Hunting/Fishing"))
HOP_SurveyData_SNAP_Vendors$Q6_5_5 <- factor(HOP_SurveyData_SNAP_Vendors$Q6_5_5, levels=c(1,0), labels=c("Used Friends/Neighbors for Food", "Did not use Friends/Neighbors for Food"))
```

```

HOP_SurveyData_SNAP_Vendors$Q6_6_6 <- factor(HOP_SurveyData_SNAP_Vendors$Q6_6_6, levels=c(1,0),
labels=c("Used Relatives for Food","Did not use Relatives for Food"))
caption <- "Frequency Table"

#Regression Modeling
#Reference Setting
HOP_SurveyData_SNAP_Vendors$sum_foodsecurity_binary <-
as.factor(HOP_SurveyData_SNAP_Vendors$sum_foodsecurity_binary)
levels(HOP_SurveyData_SNAP_Vendors$sum_foodsecurity_binary)
HOP_SurveyData_SNAP_Vendors$sum_foodsecurity_binary <-
relevel(HOP_SurveyData_SNAP_Vendors$sum_foodsecurity_binary, ref = "Food Secure")
class(HOP_SurveyData_SNAP_Vendors$sum_foodsecurity_binary)
table(HOP_SurveyData_SNAP_Vendors$sum_foodsecurity_binary)

HOP_SurveyData_SNAP_Vendors$Male <- as.factor(HOP_SurveyData_SNAP_Vendors$Male)
levels(HOP_SurveyData_SNAP_Vendors$Male)
HOP_SurveyData_SNAP_Vendors$Male <- relevel(HOP_SurveyData_SNAP_Vendors$Male, ref = "Female")

HOP_SurveyData_SNAP_Vendors$Hispanic <- as.factor(HOP_SurveyData_SNAP_Vendors$Hispanic)
levels(HOP_SurveyData_SNAP_Vendors$Hispanic)
HOP_SurveyData_SNAP_Vendors$Hispanic <- relevel(HOP_SurveyData_SNAP_Vendors$Hispanic, ref = "Not Hispanic")

HOP_SurveyData_SNAP_Vendors$RACE <- as.factor(HOP_SurveyData_SNAP_Vendors$RACE)
levels(HOP_SurveyData_SNAP_Vendors$RACE)
HOP_SurveyData_SNAP_Vendors$RACE <- relevel(HOP_SurveyData_SNAP_Vendors$RACE, ref = "White")

HOP_SurveyData_SNAP_Vendors$Marriage <- as.factor(HOP_SurveyData_SNAP_Vendors$Marriage)
levels(HOP_SurveyData_SNAP_Vendors$Marriage)
HOP_SurveyData_SNAP_Vendors$Marriage <- relevel(HOP_SurveyData_SNAP_Vendors$Marriage, ref = "Unmarried")
class(HOP_SurveyData_SNAP_Vendors$Marriage)
table(HOP_SurveyData_SNAP_Vendors$Marriage)

HOP_SurveyData_SNAP_Vendors$EmploymentStatus <-
as.factor(HOP_SurveyData_SNAP_Vendors$EmploymentStatus)
levels(HOP_SurveyData_SNAP_Vendors$EmploymentStatus)
HOP_SurveyData_SNAP_Vendors$EmploymentStatus <- relevel(HOP_SurveyData_SNAP_Vendors$EmploymentStatus,
ref = "Employed/Self-Employed")
class(HOP_SurveyData_SNAP_Vendors$EmploymentStatus)
table(HOP_SurveyData_SNAP_Vendors$EmploymentStatus)

HOP_SurveyData_SNAP_Vendors$Income <- factor(HOP_SurveyData_SNAP_Vendors$Income,levels = c("Less than
10K","10-19,999K","20-34,999K","35-49,999K","50-74,999K","75K+"))
levels(HOP_SurveyData_SNAP_Vendors$Income)
HOP_SurveyData_SNAP_Vendors$Income <- relevel(HOP_SurveyData_SNAP_Vendors$Income, ref = "Less than 10K")
class(HOP_SurveyData_SNAP_Vendors$Income)
table(HOP_SurveyData_SNAP_Vendors$Income)

HOP_SurveyData_SNAP_Vendors$EducationStatus1 <- as.factor(HOP_SurveyData_SNAP_Vendors$EducationStatus1)
levels(HOP_SurveyData_SNAP_Vendors$EducationStatus1)

```

```
HOP_SurveyData_SNAP_Vendors$EducationStatus1 <- relevel(HOP_SurveyData_SNAP_Vendors$EducationStatus1, ref
= "No HS Degree")
class(HOP_SurveyData_SNAP_Vendors$EducationStatus1)
table(HOP_SurveyData_SNAP_Vendors$EducationStatus1)
```

```
HOP_SurveyData_SNAP_Vendors$ChildrenHousehold <-
as.factor(HOP_SurveyData_SNAP_Vendors$ChildrenHousehold)
levels(HOP_SurveyData_SNAP_Vendors$ChildrenHousehold)
HOP_SurveyData_SNAP_Vendors$ChildrenHousehold <-
relevel(HOP_SurveyData_SNAP_Vendors$ChildrenHousehold, ref = "No Children")
class(HOP_SurveyData_SNAP_Vendors$ChildrenHousehold)
table(HOP_SurveyData_SNAP_Vendors$ChildrenHousehold)
```

```
HOP_SurveyData_SNAP_Vendors$FFS <- as.factor(HOP_SurveyData_SNAP_Vendors$FFS)
levels(HOP_SurveyData_SNAP_Vendors$FFS)
HOP_SurveyData_SNAP_Vendors$FFS <- relevel(HOP_SurveyData_SNAP_Vendors$FFS, ref = "No Household Food
Stamps 12 Months")
class(HOP_SurveyData_SNAP_Vendors$FFS)
table(HOP_SurveyData_SNAP_Vendors$FFS)
```

#Interaction Terms included in Modeling

```
InteractionAge <- lmer(Home_Food_Environment ~ sum_foodsecurity_binary + Q53_1_A +
sum_foodsecurity_binary*Q53_1_A + (1|ZipCode), data=HOP_SurveyData_SNAP_Vendors)
InteractionGender <- lmer(Home_Food_Environment ~ sum_foodsecurity_binary + Male + sum_foodsecurity_binary*Male
+ (1|ZipCode), data=HOP_SurveyData_SNAP_Vendors)
InteractionEthnicity <- lmer(Home_Food_Environment ~ sum_foodsecurity_binary + Hispanic +
sum_foodsecurity_binary*Hispanic + (1|ZipCode), data=HOP_SurveyData_SNAP_Vendors)
InteractionRACE <- lmer(Home_Food_Environment ~ sum_foodsecurity_binary + RACE +
sum_foodsecurity_binary*RACE + (1|ZipCode), data=HOP_SurveyData_SNAP_Vendors)
InteractionMarriage <- lmer(Home_Food_Environment ~ sum_foodsecurity_binary + Marriage +
sum_foodsecurity_binary*Marriage + (1|ZipCode), data=HOP_SurveyData_SNAP_Vendors)
InteractionEmployment <- lmer(Home_Food_Environment ~ sum_foodsecurity_binary + EmploymentStatus +
sum_foodsecurity_binary*EmploymentStatus + (1|ZipCode), data=HOP_SurveyData_SNAP_Vendors)
InteractionIncome <- lmer(Home_Food_Environment ~ sum_foodsecurity_binary + Income +
sum_foodsecurity_binary*Income + (1|ZipCode), data=HOP_SurveyData_SNAP_Vendors)
InteractionBMI <- lmer(Home_Food_Environment ~ sum_foodsecurity_binary + bmi_continuous +
sum_foodsecurity_binary*bmi_continuous + (1|ZipCode), data=HOP_SurveyData_SNAP_Vendors)
InteractionStoreAccess <- lmer(Home_Food_Environment ~ sum_foodsecurity_binary + sum_storeaccess +
sum_foodsecurity_binary*sum_storeaccess + (1|ZipCode), data=HOP_SurveyData_SNAP_Vendors)
InteractionEducation <- lmer(Home_Food_Environment ~ sum_foodsecurity_binary + EducationStatus1 +
sum_foodsecurity_binary*EducationStatus1 + (1|ZipCode), data=HOP_SurveyData_SNAP_Vendors)
InteractionChildren <- lmer(Home_Food_Environment ~ sum_foodsecurity_binary + ChildrenHousehold +
sum_foodsecurity_binary*ChildrenHousehold + (1|ZipCode), data=HOP_SurveyData_SNAP_Vendors)
InteractionFoodStamps <- lmer(Home_Food_Environment ~ sum_foodsecurity_binary + FFS +
sum_foodsecurity_binary*FFS + (1|ZipCode), data=HOP_SurveyData_SNAP_Vendors)
InteractionFoodPantry <- lmer(Home_Food_Environment ~ sum_foodsecurity_binary + Q6_1_1 +
sum_foodsecurity_binary*Q6_1_1 + (1|ZipCode), data=HOP_SurveyData_SNAP_Vendors)
InteractionFreeMeal <- lmer(Home_Food_Environment ~ sum_foodsecurity_binary + Q6_2_2 +
sum_foodsecurity_binary*Q6_2_2 + (1|ZipCode), data=HOP_SurveyData_SNAP_Vendors)
```

```

InteractionSchoolMeal <- lmer(Home_Food_Environment ~ sum_foodsecurity_binary + Q6_3_3 +
sum_foodsecurity_binary*Q6_3_3 + (1|ZipCode), data=HOP_SurveyData_SNAP_Vendors)
InteractionHuntFish <- lmer(Home_Food_Environment ~ sum_foodsecurity_binary + Q6_4_4 +
sum_foodsecurity_binary*Q6_4_4 + (1|ZipCode), data=HOP_SurveyData_SNAP_Vendors)
InteractionFriendsNeighbors <- lmer(Home_Food_Environment ~ sum_foodsecurity_binary + Q6_5_5 +
sum_foodsecurity_binary*Q6_5_5 + (1|ZipCode), data=HOP_SurveyData_SNAP_Vendors)
InteractionRelatives <- lmer(Home_Food_Environment ~ sum_foodsecurity_binary + Q6_6_6 +
sum_foodsecurity_binary*Q6_6_6 + (1|ZipCode), data=HOP_SurveyData_SNAP_Vendors)
InteractionNumberofSNAPVendors <- lmer(Home_Food_Environment ~ sum_foodsecurity_binary +
Number_of_SNAP_Vendors + sum_foodsecurity_binary*Number_of_SNAP_Vendors + (1|ZipCode),
data=HOP_SurveyData_SNAP_Vendors)
InteractionHealthySNAP <- lmer(Home_Food_Environment ~ sum_foodsecurity_binary + Healthy_SNAP_Vendors +
sum_foodsecurity_binary*Healthy_SNAP_Vendors + (1|ZipCode), data=HOP_SurveyData_SNAP_Vendors)
InteractionUnhealthySNAP <- lmer(Home_Food_Environment ~ sum_foodsecurity_binary + Unhealthy_SNAP_Vendors +
sum_foodsecurity_binary*Unhealthy_SNAP_Vendors + (1|ZipCode), data=HOP_SurveyData_SNAP_Vendors)

```

```

anova(InteractionAge)
anova(InteractionGender)
anova(InteractionEthnicity)
anova(InteractionRACE)
anova(InteractionMarriage)
anova(InteractionEmployment)
anova(InteractionIncome)
anova(InteractionBMI)
anova(InteractionStoreAccess)
anova(InteractionEducation)
anova(InteractionChildren)
anova(InteractionFoodStamps)
anova(InteractionFoodPantry)
anova(InteractionFreeMeal)
anova(InteractionSchoolMeal)
anova(InteractionHuntFish)
anova(InteractionFriendsNeighbors)
anova(InteractionRelatives)
anova(InteractionNumberofSNAPVendors)
anova(InteractionHealthySNAP)
anova(InteractionUnhealthySNAP)

```

#Analysis

```

model100 <- lmer(Home_Food_Environment ~ sum_foodsecurity_binary + (1|ZipCode), data =
HOP_SurveyData_SNAP_Vendors)
anova(model100)
is_singular <- isSingular(model100)
print(is_singular)
summary(model100)
print(model100)
vif(model100)
icc(model100)

```

```

model1 <- lmer(Home_Food_Environment ~ sum_foodsecurity_binary + Q53_1_A + Male + Hispanic + RACE + Marriage +
EmploymentStatus + Income + bmi_continuous + sum_storeaccess + EducationStatus1 + ChildrenHousehold + FFS + Q6_1_1
+ Q6_2_2 + Q6_3_3 + Q6_4_4 + Q6_5_5 + Q6_6_6 + Number_of_SNAP_Vendors + Healthy_SNAP_Vendors +
Unhealthy_SNAP_Vendors + sum_foodsecurity_binary*RACE + sum_foodsecurity_binary*Q6_1_1 + (1|ZipCode), data =
HOP_SurveyData_SNAP_Vendors)
anova(model1)
is_singular <- isSingular(model1)
print(is_singular)
summary(model1)
print(model1)
vif(model1)
icc(model1)

```

```

CI.A1 = as.matrix(tidy(model1 ,conf.int=TRUE,exponentiate=FALSE,effects="fixed") %>% dplyr::select(term, estimate,
conf.low, conf.high, p.value))

```

```

FullyAdjustedModel = rbind(CI.A1[-1, ])
FullyAdjustedModel = data.frame(FullyAdjustedModel)
print(FullyAdjustedModel)
write.csv(FullyAdjustedModel,"C:\Users\User\OneDrive - Clemson
University\Documents\Courses\PhD\Summer 2023\Independent Study\FullyAdjustedModel.csv")

```

```

model0 <- lmer(Home_Food_Environment ~ sum_foodsecurity_binary + (1|ZipCode), data =
HOP_SurveyData_SNAP_Vendors)
anova(model0)
summary(model0)
confint(model0)
print(model0)
icc(model0, ci = 0.95)

```

```

CI.Z = as.matrix(tidy(model0 ,conf.int=TRUE,exponentiate=FALSE,effects="fixed") %>% dplyr::select(term, estimate,
conf.low, conf.high, p.value))

```

```

model5 <- lmer(Home_Food_Environment ~ Q53_1_A + (1|ZipCode), data = HOP_SurveyData_SNAP_Vendors)
anova(model5)
summary(model5)
confint(model5)
print(model5)
icc(model5, ci = 0.95)

```

```

CI.A = as.matrix(tidy(model5 ,conf.int=TRUE,exponentiate=FALSE,effects="fixed") %>% dplyr::select(term, estimate,
conf.low, conf.high, p.value))

```

```

model7 <- lmer(Home_Food_Environment ~ Male + (1|ZipCode), data = HOP_SurveyData_SNAP_Vendors)
anova(model7)
summary(model7)
confint(model7)
print(model7)
icc(model7, ci = 0.95)

```

```
CI.B = as.matrix(tidy(model7 ,conf.int=TRUE,exponentiate=FALSE,effects="fixed") %>% dplyr::select(term, estimate,
conf.low, conf.high, p.value))
```

```
model9 <- lmer(Home_Food_Environment ~ Hispanic + (1|ZipCode), data = HOP_SurveyData_SNAP_Vendors)
anova(model9)
summary(model9)
confint(model9)
print(model9)
icc(model9, ci = 0.95)
```

```
CI.C = as.matrix(tidy(model9 ,conf.int=TRUE,exponentiate=FALSE,effects="fixed") %>% dplyr::select(term, estimate,
conf.low, conf.high, p.value))
```

```
model11 <- lmer(Home_Food_Environment ~ RACE + (1|ZipCode), data = HOP_SurveyData_SNAP_Vendors)
anova(model11)
summary(model11)
confint(model11)
print(model11)
icc(model11, ci = 0.95)
```

```
CI.D = as.matrix(tidy(model11 ,conf.int=TRUE,exponentiate=FALSE,effects="fixed") %>% dplyr::select(term, estimate,
conf.low, conf.high, p.value))
```

```
model13 <- lmer(Home_Food_Environment ~ Marriage + (1|ZipCode), data = HOP_SurveyData_SNAP_Vendors)
anova(model13)
summary(model13)
confint(model13)
print(model13)
icc(model13, ci = 0.95)
```

```
CI.1 = as.matrix(tidy(model13 ,conf.int=TRUE,exponentiate=FALSE,effects="fixed") %>% dplyr::select(term, estimate,
conf.low, conf.high, p.value))
```

```
model15 <- lmer(Home_Food_Environment ~ EmploymentStatus + (1|ZipCode), data = HOP_SurveyData_SNAP_Vendors)
anova(model15)
summary(model15)
confint(model15)
print(model15)
icc(model15, ci = 0.95)
```

```
HOP_SurveyData_SNAP_Vendors$EmploymentStatus <-
as.factor(HOP_SurveyData_SNAP_Vendors$EmploymentStatus)
```

```
CI.2 = as.matrix(tidy(model15 ,conf.int=TRUE,exponentiate=FALSE,effects="fixed") %>% dplyr::select(term, estimate,
conf.low, conf.high, p.value))
```

```
model17 <- lmer(Home_Food_Environment ~ Income + (1|ZipCode), data = HOP_SurveyData_SNAP_Vendors)
anova(model17)
```



```
summary(model17)
confint(model17)
print(model17)
icc(model17, ci = 0.95)
```

```
HOP_SurveyData_SNAP_Vendors$Income <- as.factor(HOP_SurveyData_SNAP_Vendors$Income)
```

```
CI.3 = as.matrix(tidy(model17 ,conf.int=TRUE,exponentiate=FALSE,effects="fixed") %>% dplyr::select(term, estimate,
conf.low, conf.high, p.value))
print(CI.3)
```

```
model19 <- lmer(Home_Food_Environment ~ bmi_continuous + (1|ZipCode), data = HOP_SurveyData_SNAP_Vendors)
anova(model19)
summary(model19)
confint(model19)
print(model19)
icc(model19, ci = 0.95)
```

```
CI.4 = as.matrix(tidy(model19 ,conf.int=TRUE,exponentiate=FALSE,effects="fixed") %>% dplyr::select(term, estimate,
conf.low, conf.high, p.value))
```

```
model21 <- lmer(Home_Food_Environment ~ EducationStatus1 + (1|ZipCode), data = HOP_SurveyData_SNAP_Vendors)
anova(model21)
summary(model21)
confint(model21)
print(model21)
icc(model21, ci = 0.95)
```

```
HOP_SurveyData_SNAP_Vendors$EducationStatus1 <- as.factor(HOP_SurveyData_SNAP_Vendors$EducationStatus1)
```

```
CI.5 = as.matrix(tidy(model21 ,conf.int=TRUE,exponentiate=FALSE,effects="fixed") %>% dplyr::select(term, estimate,
conf.low, conf.high, p.value))
```

```
model23 <- lmer(Home_Food_Environment ~ ChildrenHousehold + (1|ZipCode), data =
HOP_SurveyData_SNAP_Vendors)
anova(model23)
summary(model23)
confint(model23)
print(model23)
icc(model23, ci = 0.95)
```

```
HOP_SurveyData_SNAP_Vendors$ChildrenHousehold <-
as.factor(HOP_SurveyData_SNAP_Vendors$ChildrenHousehold)
```

```
CI.6 = as.matrix(tidy(model23 ,conf.int=TRUE,exponentiate=FALSE,effects="fixed") %>% dplyr::select(term, estimate,
conf.low, conf.high, p.value))
```

```
model25 <- lmer(Home_Food_Environment ~ Q6_1_1 + (1|ZipCode), data = HOP_SurveyData_SNAP_Vendors)
anova(model25)
```

```
summary(model25)
confint(model25)
print(model25)
icc(model25, ci = 0.95)
```

```
CI.7 = as.matrix(tidy(model25 ,conf.int=TRUE,exponentiate=FALSE,effects="fixed") %>% dplyr::select(term, estimate,
conf.low, conf.high, p.value))
```

```
model27 <- lmer(Home_Food_Environment ~ Q6_2_2 + (1|ZipCode), data = HOP_SurveyData_SNAP_Vendors)
anova(model27)
summary(model27)
confint(model27)
print(model27)
icc(model27, ci = 0.95)
```

```
CI.8 = as.matrix(tidy(model27 ,conf.int=TRUE,exponentiate=FALSE,effects="fixed") %>% dplyr::select(term, estimate,
conf.low, conf.high, p.value))
```

```
model29 <- lmer(Home_Food_Environment ~ Q6_3_3 + (1|ZipCode), data = HOP_SurveyData_SNAP_Vendors)
anova(model29)
summary(model29)
confint(model29)
print(model29)
icc(model29, ci = 0.95)
```

```
CI.9 = as.matrix(tidy(model29 ,conf.int=TRUE,exponentiate=FALSE,effects="fixed") %>% dplyr::select(term, estimate,
conf.low, conf.high, p.value))
```

```
model31 <- lmer(Home_Food_Environment ~ Q6_4_4 + (1|ZipCode), data = HOP_SurveyData_SNAP_Vendors)
anova(model31)
summary(model31)
confint(model31)
print(model31)
icc(model31, ci = 0.95)
```

```
CI.10 = as.matrix(tidy(model31 ,conf.int=TRUE,exponentiate=FALSE,effects="fixed") %>% dplyr::select(term, estimate,
conf.low, conf.high, p.value))
```

```
model33 <- lmer(Home_Food_Environment ~ Q6_5_5 + (1|ZipCode), data = HOP_SurveyData_SNAP_Vendors)
anova(model33)
summary(model33)
confint(model33)
print(model33)
icc(model33, ci = 0.95)
```

```
CI.H = as.matrix(tidy(model33 ,conf.int=TRUE,exponentiate=FALSE,effects="fixed") %>% dplyr::select(term, estimate,
conf.low, conf.high, p.value))
```

```
model35 <- lmer(Home_Food_Environment ~ Q6_6_6 + (1|ZipCode), data = HOP_SurveyData_SNAP_Vendors)
```

```
anova(model35)
summary(model35)
confint(model35)
print(model35)
icc(model35, ci = 0.95)
```

```
CI.11 = as.matrix(tidy(model35 ,conf.int=TRUE,exponentiate=FALSE,effects="fixed") %>% dplyr::select(term, estimate,
conf.low, conf.high, p.value))
```

```
model37 <- lmer(Home_Food_Environment ~ Number_of_SNAP_Vendors + (1|ZipCode), data =
HOP_SurveyData_SNAP_Vendors)
anova(model37)
summary(model37)
confint(model37)
print(model37)
icc(model37, ci = 0.95)
```

```
CI.12 = as.matrix(tidy(model37 ,conf.int=TRUE,exponentiate=FALSE,effects="fixed") %>% dplyr::select(term, estimate,
conf.low, conf.high, p.value))
```

```
model39 <- lmer(Home_Food_Environment ~ Healthy_SNAP_Vendors + (1|ZipCode), data =
HOP_SurveyData_SNAP_Vendors)
anova(model39)
summary(model39)
confint(model39)
print(model39)
icc(model39, ci = 0.95)
```

```
CI.13 = as.matrix(tidy(model39 ,conf.int=TRUE,exponentiate=FALSE,effects="fixed") %>% dplyr::select(term, estimate,
conf.low, conf.high, p.value))
```

```
model41 <- lmer(Home_Food_Environment ~ Unhealthy_SNAP_Vendors + (1|ZipCode), data =
HOP_SurveyData_SNAP_Vendors)
anova(model41)
summary(model41)
confint(model41)
icc(model41, ci = 0.95)
```

```
CI.14 = as.matrix(tidy(model41 ,conf.int=TRUE,exponentiate=FALSE,effects="fixed") %>% dplyr::select(term, estimate,
conf.low, conf.high, p.value))
```

```
model43 <- lmer(Home_Food_Environment ~ sum_storeaccess + (1|ZipCode), data = HOP_SurveyData_SNAP_Vendors)
anova(model43)
summary(model43)
confint(model43)
print(model43)
icc(model43, ci = 0.95)
```

```
CI.15 = as.matrix(tidy(model43 ,conf.int=TRUE,exponentiate=FALSE,effects="fixed") %>% dplyr::select(term, estimate,
conf.low, conf.high, p.value))
```

```
model45 <- lmer(Home_Food_Environment ~ FFS + (1|ZipCode), data = HOP_SurveyData_SNAP_Vendors)
anova(model45)
summary(model45)
confint(model45)
print(model45)
icc(model45, ci = 0.95)
```

```
CI.16 = as.matrix(tidy(model45 ,conf.int=TRUE,exponentiate=FALSE,effects="fixed") %>% dplyr::select(term, estimate,
conf.low, conf.high, p.value))
```

```
FullyUnadjustedModel = rbind(CI.Z[-1, ], CI.A[-1, ], CI.B[-1, ], CI.C[-1, ], CI.D[-1, ], CI.1[-1, ], CI.2[-1, ], CI.3[-1, ], CI.4[-1, ],
CI.5[-1, ], CI.6[-1, ], CI.7[-1, ], CI.8[-1, ], CI.9[-1, ], CI.10[-1, ], CI.H[-1, ], CI.11[-1, ], CI.12[-1, ], CI.13[-1, ], CI.14[-1, ], CI.15[-1, ],
CI.16[-1, ])
```

```
FullyUnadjustedModel = data.frame(FullyUnadjustedModel)
```

```
print(FullyUnadjustedModel)
```

```
write.csv(FullyUnadjustedModel,"C:\ \Users\ \User\ \OneDrive - Clemson University\ \Documents\ \Courses\ \PhD\ \Summer 2023\ \Independent Study\ \FullyUnadjustedModel.csv")
```

## FOOD ACCESS AND HEALTH ASSESSMENT - HOP Counties

County Codes: 5-Hampton, 7-Lee, 8-Marion

County Code (ex. 1) \_\_\_\_\_

Last 4 digits of interviewee phone number (ex. 4564)

Interview Initials (ex. SG):

## Screening Section

1. In what county do you currently live?
- ☐ Hampton
  - ☐ Lee
  - ☐ Marion
2. What is your zip code? \_\_\_\_\_
3. Where do you shop for food?
- a. City/Town: \_\_\_\_\_
  - b. Stores: \_\_\_\_\_
  - c. Of these, which store do you shop/buy most of your food? \_\_\_\_\_

## Food Access

4. Please indicate how often you or members of your household shopped for food during the last 3 months at the following different types of food stores.

[illegible]

|                                           |                       |                       |                       |                       |                       |                       |
|-------------------------------------------|-----------------------|-----------------------|-----------------------|-----------------------|-----------------------|-----------------------|
|                                           |                       |                       |                       |                       |                       |                       |
| Farmers' market or produce stand          | <input type="radio"/> |
| Big box stores (Costco, Sam's Club, etc.) | <input type="radio"/> |

5. Over the last 3 months, how often did you use the following types of transportation to go food shopping?

|                                    | Never                 | Sometimes             | Most of the time      | All of the time       | Don't know            | Refuse to answer      |
|------------------------------------|-----------------------|-----------------------|-----------------------|-----------------------|-----------------------|-----------------------|
| My own car                         |                       |                       |                       |                       | <input type="radio"/> | <input type="radio"/> |
| Getting a ride with someone I know | <input type="radio"/> | <input type="radio"/> | <input type="radio"/> | <input type="radio"/> |                       |                       |
| Public transportation              | <input type="radio"/> |
| Taxi service, Uber, or Lyft        | <input type="radio"/> |
| Bike                               |                       |                       |                       |                       | <input type="radio"/> | <input type="radio"/> |
| Walking                            | <input type="radio"/> | <input type="radio"/> | <input type="radio"/> | <input type="radio"/> |                       |                       |
| Senior bus                         | <input type="radio"/> |
| Other                              | <input type="radio"/> |

6. In the past 3 months, how often has your household depended on any of the following food sources?

|  | Less than once a<br>Never month | Once a<br>month | 2-3 times a<br>month | Every<br>week | Don't<br>know | Refuse to<br>answer |
|--|---------------------------------|-----------------|----------------------|---------------|---------------|---------------------|
|--|---------------------------------|-----------------|----------------------|---------------|---------------|---------------------|

|                                                               |                       |                       |                       |                       |                       |                       |                       |                       |
|---------------------------------------------------------------|-----------------------|-----------------------|-----------------------|-----------------------|-----------------------|-----------------------|-----------------------|-----------------------|
| Food pantry                                                   | <input type="radio"/> | <input type="radio"/> |                       | <input type="radio"/> |
| Free meal (Salvation Army, Community Center)                  |                       |                       |                       |                       |                       |                       | <input type="radio"/> | <input type="radio"/> |
| Federal school lunch or breakfast program                     |                       |                       |                       | <input type="radio"/> |
| Hunting or fishing                                            | <input type="radio"/> |
| Friends, co-workers, neighbors                                | <input type="radio"/> |
|                                                               |                       |                       |                       | <input type="radio"/> |
| Relatives outside of the home<br>Community or personal garden | <input type="radio"/> |
|                                                               |                       |                       |                       | <input type="radio"/> |
| Senior Center Food Distribution programs                      |                       |                       |                       |                       |                       |                       | <input type="radio"/> | <input type="radio"/> |
|                                                               |                       |                       |                       |                       |                       |                       | <input type="radio"/> | <input type="radio"/> |
| Other                                                         |                       |                       |                       | <input type="radio"/> | <input type="radio"/> | <input type="radio"/> |                       |                       |
|                                                               | <input type="radio"/> |

7. In the past 12 months, did you/any family members living here receive food stamp benefits/ [SNAP or food stamp benefits]?
- ☐ Yes
  - ☐ No
  - ☐ Don't Know
8. Did you/any family members living here receive food stamp benefits/ [SNAP or food stamp benefits] in the last 30 days?
- ☐ Yes
  - ☐ No
  - ☐ Don't Know
9. Thinking about the store where you buy most of your food, how do you usually travel to this store?
- ☐ Car
  - ☐ Other form of transportation

**10.** About how long would it take you to get from your home to the store where you buy most of your food, if you walked there?

- ☐ 10 minutes or less
- ☐ 11-20 minutes
- ☐ 21-30 minutes
- ☐ More than 30 minutes

**11.** How important are each of the following factors in your decision to shop at the store where you buy most of your food?

|                                                            | Not at all<br>important | A little<br>important | Somewhat<br>important | Very<br>important     |
|------------------------------------------------------------|-------------------------|-----------------------|-----------------------|-----------------------|
| Near your home                                             | <input type="radio"/>   | <input type="radio"/> | <input type="radio"/> | <input type="radio"/> |
| Near or on the way to other<br>places where you spend time | <input type="radio"/>   | <input type="radio"/> | <input type="radio"/> | <input type="radio"/> |

### **Food Security**

**12.** Please state how easy it is to access (purchase or get) the following items in your local community.

|                                                    | Not<br>easy           | Somewhat<br>easy      | Very easy             | Do not<br>know        | Refuse to<br>answer   |
|----------------------------------------------------|-----------------------|-----------------------|-----------------------|-----------------------|-----------------------|
| Fresh fruits and vegetables                        |                       |                       |                       | <input type="radio"/> | <input type="radio"/> |
| Locally grown or home-made food items              | <input type="radio"/> | <input type="radio"/> | <input type="radio"/> |                       |                       |
| Food support services (food pantry, free<br>meals) | <input type="radio"/> |
| Farmer's market or produce stands                  |                       |                       |                       | <input type="radio"/> | <input type="radio"/> |
| Affordable food                                    | <input type="radio"/> | <input type="radio"/> | <input type="radio"/> |                       |                       |
| Healthy food                                       | <input type="radio"/> |
|                                                    | <input type="radio"/> |



Fast food

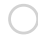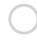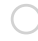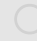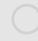

13. Do you have access to food through (check all that apply): Your own garden

☐

A neighbor's garden

☐

A community garden

☐

14. In the past 3 months, have you or anyone in your household had to choose between buying the food you need or paying for any of the following? Check all that apply.

☐

Medicine or medicinal care

☐

Utilities (electricity or cell phone) Rent or mortgage

☐

Gas or fuel for vehicle

☐

Other bills (childcare) Do not know

☐**Refuse to answer N/A**☐

Now I'm going to read you several statements that people have made about their food situation. For these statements, please tell me whether the statement was often true, sometimes true, or never true for (you/your household) in the last 3 months.

☐

15. The first statement is, "The food that (I/we) bought just didn't last, and (I/we) didn't have money to get more." Was that often, sometimes, or never true for (you/your household) in the last 3 months?

☐

Often true  
Sometimes true  
Never True

☐

Often true

☐

Sometimes true

☐

Never True

☐**Don't know Refuse to answer**☐

16. "(I/we) couldn't afford to eat balanced meals." Was that often, sometimes, or never true for (you/your household) in the last 3 months? Often true

☐

Sometimes true

☐

Never True

☐**Don't know Refuse to answer**☐

17. In the last 3 months, did (you/you or other adults in your household) ever cut the size of your meals or skip meals because there wasn't enough money for food? Yes No

☐

Yes No

☐**Don't know**

Go to question 18 if they respond yes to question 17. Otherwise, skip to question 19.

☐

18. How often did this happen - almost every month, some months but not every month, or in only 1 or 2 months?

☐

Almost every month

☐

Some months but not every month Only 1 or 2 months

☐**Don't know**☐

19. In the last 3 months, did you ever eat less than you felt you should because there wasn't enough money for food?

- ☐ Yes No  
☐ Don't know  
☐ **20.** In the last 3 months, were you ever hungry but didn't eat because there wasn't enough money for food? Yes No  
☐ Don't know  
☐  
☐

### **Eating Behaviors**

**21.** Now think about the foods you ate or drank during the past month, that is, the past 30 days, including meals and snacks. **(Only enter a response in one column per item)**

|                                                                                                                                               | Times per day | Times per week | Times per month |
|-----------------------------------------------------------------------------------------------------------------------------------------------|---------------|----------------|-----------------|
| Not including juices, how often did you eat fruit?<br>You can tell me times per day, times per week or times per month.                       |               |                |                 |
| Not including fruit-flavored drinks or fruit juices with added sugar, how often did you drink 100% fruit juice such as apple or orange juice? |               |                |                 |
| How often did you eat a green leafy or lettuce salad, with or without other vegetables?                                                       |               |                |                 |
| How often did you eat any kind of fried potatoes, including French fries, home fries, or hash browns?                                         |               |                |                 |
| How often did you eat any other kind of potatoes, or sweet potatoes, such as baked, boiled, mashed potatoes, or potato salad?                 |               |                |                 |
| Not including lettuce salads and potatoes, how often did you eat other vegetables?                                                            |               |                |                 |

**22.** Please indicate whether each of these food items were available in your home in the past week:

| (a-j)                                             | Yes | No |
|---------------------------------------------------|-----|----|
| Bananas                                           |     |    |
| Apples                                            |     |    |
| Grapes                                            |     |    |
| Carrots                                           |     |    |
| Tomatoes                                          |     |    |
| Dark leafy greens (spinach, collards, kale, etc.) |     |    |

|                      |  |  |
|----------------------|--|--|
| Reduced-fat hot dogs |  |  |
| Whole-grain bread    |  |  |
| Low-fat milk         |  |  |
| Diet soda            |  |  |

**23.** Please indicate whether each of these food items were available in your home in the past week:

| (a-f)                                                        | Yes | No |
|--------------------------------------------------------------|-----|----|
| Candy or cookies                                             |     |    |
| Snack chips (potato chips, corn chips, tortilla chips, etc.) |     |    |
| Regular whole milk                                           |     |    |
| Regular (non-diet) soda                                      |     |    |
| Regular hot dogs                                             |     |    |
| White bread                                                  |     |    |

- 24.** In ☐ your home, how often do you...
- ☐ a. Have fruits and vegetables in the refrigerator?
  - ☐ Never or rarely Sometimes
  - ☐ Often
  - ☐ Almost always
  - ☐ b. Have fruit available in a bowl or on the counter?
  - ☐ Never or rarely Sometimes
  - ☐ Often
  - ☐ Almost always
  - ☐

**25.** In your home, how often do you...

- ☐ a. Have candy or chips available to eat?
- ☐ Never or rarely Sometimes
- ☐ Often
- ☐ Almost always
- ☐ b. Have ice-cream, cake, pastries, or ready-to-eat sweet baked goods (cookies, brownies, etc.)?

- ☐ Never or rarely Sometimes
- ☐ Often
- ☐ Almost always
- ☐

### **BRFSS Physical Activity**

26. During the past month, other than your regular job, did you participate in any physical activities or exercise such as running, calisthenics, golf, gardening or walking exercise?

☐ Yes ☐ No

☐ **Don't know Refused**

Go to ☐ question 27 if they respond yes to question 26. Otherwise, skip to question 30.

☐ 27. What type of physical activity or exercise did you spend the most time doing during the last month? (select the type that best fits what they tell you)

☐ 03 Backpacking ☐ 05

☐ 24 Horseback riding

☐ 37

Basketball ☐ 07

☐ 25 Hunting large game

Running ☐

—  
deer, elk

43

Bicycling ☐ 08 Boating

Skateboarding

(Canoeing, rowing,  
kayaking, sailing for pleasure or  
camping) ☐ 16 Fishing from  
river bank or

☐ 26 Hunting small  
game —

☐ 51 Soccer

quail

☐ 52 Softball/Baseball

boat ☐ 17 Frisbee ☐

☐ 28 Jogging ☐ 29

18 Gardening (spading,  
weeding, digging, filling) ☐ 19

Lacrosse ☐ 31

☐ 55 Stream fishing in  
waders ☐ 57 Swimming

Golf (with motorized cart) ☐

Mowing lawn ☐

☐ 61 Tennis ☐ 64

20 Golf (without motorized cart)

36 Raking  
lawn/trimming

Walking ☐ 67 Weight

☐ 22 Hiking — cross-country

lifting ☐ 69 Yoga

☐ 71 Childcare ☐ 72

Farm/Ranch Work

(caring for livestock, stacking hay, etc.)

☐ 74 Karate/Martial Arts ☐ 76

Yard work

(cutting/gathering wood, trimming,

etc.) ☐ 77 Other/Not listed ☐

77 Refused

28. How many times per week or per month did you take part in this activity?

Times per week \_\_\_\_\_

Times per month \_\_\_\_\_

☐

☐ **Don't know Refused**

29. And when you took part in this activity, for how many minutes or hours did you usually keep at it? Hours \_\_\_\_\_

Minutes \_\_\_\_\_

☐

☐ **Don't know Refused**

☐

### **Physical Activity**

30. In the past 7 days, did you walk for transportation [This is walking you might have done to travel to and from work, to do errands, or to go from place to place. Include walking to or from a bus, train, or bus stop]?

☐

☐

☐

☐

Yes

No

**Don't know Refused**

Go to question 31 if they respond yes to question 30. Otherwise, skip to question 30.

31. In the past 7 days, how many days did you walk for transportation? 0 days

☐

1 day

☐

2 days

☐

3 days

☐

4 days

☐

5 days

☐

6 days

☐

7 days

☐

☐ **Don't know Refused**

32. On average, how many times per day did you walk for transportation? Times per day

\_\_\_\_\_

33. How long did that walk take? On average, how long did those walks take?

Hours \_\_\_\_\_

Minutes \_\_\_\_\_

34. Sometimes you may walk for fun, relaxation, exercise, or to walk the dog. In the past 7 days, did you walk for any of these reasons? Yes No

☐

☐ **Don't know Refused**

Go to ☐ question 35 if they respond yes to question 34. Otherwise, skip to question 38.

35. ☐ In the past 7 days, how many days did you walk for leisure or exercise? 0

☐ days

☐ 1 day

☐ 2 days

☐ 3 days

☐ 4 days

☐ 5 days

6 days

☐ 7 days

☐ **Don't know Refused**

36. On average, how many times per day did you walk for leisure or exercise? Times per day \_\_\_\_\_

37. How long did that walk take? On average, how long did those walks take? Hours

\_\_\_\_\_

Minutes \_\_\_\_\_

### **Neighborhood**

The next questions are about where you live. By where you live we mean in your neighborhood or near your home.

38. Where you live, are there roads, sidewalks, paths or trails where you can walk? Yes  
No

**Don't know Refused**

- [illegible]



- ☐
- ☐
- ☐
- ☐

- ☐
- ☐
- ☐
- ☐

Yes

No

**Don't know Refused**

46. Do dogs or other animals make it unsafe for you to walk? Yes

No

**Don't know Refused**

47. How often are there people walking within sight of your home? Would you say every day, every 2 to 3 days, about once a week, or less than once a week? Every day

- ☐ Every 2 to 3 days
- ☐ About once a week
- ☐ Less than once a week
- ☐ **Don't know Refused**
- ☐

**Stress**

48. Thinking about the amount of stress in your life, would you say that most days are: Not at

- ☐ all stressful
- ☐ Not very stressful
- ☐ A bit stressful
- ☐ Quite a bit stressful
- ☐ Very Stressful

49. In the last month, how often have you....

|                                                             | Never                 | Almost never          | Sometimes             | Fairly often          | Very Often            |
|-------------------------------------------------------------|-----------------------|-----------------------|-----------------------|-----------------------|-----------------------|
| been upset because of something that happened unexpectedly? | <input type="radio"/> |

felt that you were unable to control the important things in your life?

☐☐☐☐☐

felt nervous and “stressed”?

☐☐☐☐☐

felt confident about your ability to handle your personal problems?

☐☐☐☐☐

felt that things were going your way?

☐☐☐☐☐

found that you could not cope with all the things that you had to do?

☐☐☐☐☐

been able to control irritations in your life?

☐☐☐☐☐

felt that you were on top of things?

☐☐☐☐☐

been angered because of things that were outside of your control?

☐☐☐☐☐

felt difficulties were piling up so high that you could not overcome them?

☐☐☐☐☐

### **Community Belonging**

**50.** How would you describe your sense of belonging to your local community? Would you say it is:

- ☐ Very strong
- ☐ Somewhat strong
- ☐ Somewhat weak
- ☐ Very weak

**51.** How strongly would you agree or disagree that:

|                                                                       | Strongly disagree     | Disagree              | Agree                 | Strongly Agree        |
|-----------------------------------------------------------------------|-----------------------|-----------------------|-----------------------|-----------------------|
| People around here are willing to help their neighbors                | <input type="radio"/> | <input type="radio"/> | <input type="radio"/> | <input type="radio"/> |
| This is a close-knit neighborhood                                     | <input type="radio"/> | <input type="radio"/> | <input type="radio"/> | <input type="radio"/> |
| People in this neighborhood can be trusted                            | <input type="radio"/> | <input type="radio"/> | <input type="radio"/> | <input type="radio"/> |
| People in this neighborhood generally don't get along with each other | <input type="radio"/> | <input type="radio"/> | <input type="radio"/> | <input type="radio"/> |
| People in this neighborhood do not share the same values              | <input type="radio"/> | <input type="radio"/> | <input type="radio"/> | <input type="radio"/> |

**52.** How likely would you say it is that neighbors know each other well enough that they could be counted on to intervene in various ways if:

|                                                                  | Very Unlikely         | Unlikely              | Likely                | Very Likely           |
|------------------------------------------------------------------|-----------------------|-----------------------|-----------------------|-----------------------|
| Children were skipping school and hanging out on a street corner | <input type="radio"/> | <input type="radio"/> | <input type="radio"/> | <input type="radio"/> |
| Children were spray-painting graffiti on a local building        | <input type="radio"/> | <input type="radio"/> | <input type="radio"/> | <input type="radio"/> |
| Children were showing disrespect to an adult                     | <input type="radio"/> | <input type="radio"/> | <input type="radio"/> | <input type="radio"/> |
| A fight broke out in front of their house                        | <input type="radio"/> | <input type="radio"/> | <input type="radio"/> | <input type="radio"/> |

The fire station or other community resource, such as park or community center, closest to their home was being threatened with budget cuts

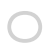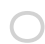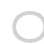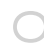

### **Demographics**

I will ask you some questions about yourself in the next section. We include these questions so that we can compare health indicators by groups.

53. What is your age (in years)?

☐ Years \_\_\_\_\_

☐ **Don't know Refused**

54. What is your sex?

☐ Male

☐ Female

☐

☐ **Neither of these Refused**

55. Are you of Hispanic, Latino/a, or Spanish origin?

☐

☐

☐

☐

Yes

No

**Don't know Refused**

56. Which one of these groups would you say best represents your race? (Check all that apply)

White

Black or African American

American Indian or Alaska Native

Asian

Pacific Islander

**Don't know Refused**

- ☐ **57.** Are you,
- ☐ Married
- ☐ Widowed
- ☐ Divorced
- ☐ Never married
- ☐ A member of an unmarried couple **Refused**

- ☐ **58.** Are you
- ☐ currently,
- ☐ Employed for
- ☐ wages
- ☐ Self-employed
- ☐ Out of work for 1 year or less
- ☐ Out of work for more than 1 year
- ☐ A homemaker
- ☐ A student
- ☐ Retired
- ☐ Unable to work
- ☐ **Refused**

- ☐ **59.** Is your household income from all sources,
- ☐ Less than \$10,000
- ☐ \$10,000 to less than \$15,000
- ☐ \$15,000 to less than \$20,000
- ☐ \$20,000 to less than \$25,000
- ☐ \$25,000 to less than \$35,000
- ☐ \$35,000 to less than \$50,000
- ☐ \$50,000 to less than \$75,000
- ☐ \$75,000 or more

**60.** About how much do you weigh without shoes? Pounds \_\_\_\_\_

- ☐ **Don't know Refused**

**61.** About how tall are you without shoes?

Feet \_\_\_\_\_

Inches \_\_\_\_\_

- ☐ **Don't know Refused**

**62.** What is the number of people in your household?

Adults \_\_\_\_\_

Children (below 18 years) \_\_\_\_\_

**63.** What is the highest level of school you have completed or the highest degree you have received? ☐ Never attended/kindergarten only

☐ Grade 1-11 ☐ 12th grade, no diploma ☐ GED or equivalent ☐ High school graduate ☐ Some college, no degree

☐ Associate degree: occupational, technical, or vocational program ☐ Associate degree: academic program ☐ Bachelor's Degree (ex. BA, AB, BS, BBA) ☐ Master's Degree (MA, MS, MEng, MEd, MBA) ☐ Professional School (MD, DDS, DVM, JD) ☐ Doctoral Degree (ex. PhD, EdD)

☐ **Don't know**

☐ **Refused**

64. How did you hear about this survey?
